# Supplementary material for: Triphenylsulfonium topophotochemistry
Source: Royal Society of Chemistry journal article supplement (doi:10.1039/c7pp00324b), 2017-11-03
Supplement: c7pp00324b1.pdf [file c7pp00324b1.pdf]

# Triphenylsulfonium topophotochemistry

*Emmanuelle Despagnet-Ayoub, Wesley W. Kramer, Wesley Sattler, Aaron Sattler, Paul J. LaBeaume, James W. Thackeray, James F. Cameron, Thomas Cardolaccia, Aaron A. Rachford, Jay R. Winkler, Harry B. Gray*

## Contents:

- 1. Emission spectrum for the irradiation sources.**
- 2. Monitoring over time the formation of photoproducts under 193-nm irradiation.**
- 3. 193-nm irradiation of TPS films with different polymer matrixes.**
- 4. Monitoring over time the formation of photoproducts at 254-nm irradiation.**
- 5. DOSY-NMR experiment.**
- 6. Photoproducts of TPS in solution (cuvette set-up).**
- 7. Photoproducts of TPS in wafers (lithography set-up).**
- 8. Cross-experiment by irradiation of a 10 % w/v PMMA/ 0.5% w/v TPS/ 0.5% w/v tBu-TPS film.**

**1. Emission spectrum for the irradiation sources.**

- a) **193-nm irradiation** (30 W D<sub>2</sub>-lamp with a 193 nm bandpass (20+/-5 nm FWHM) filter (flux through 1" aperture at 10 cm =  $4.3 \times 10^{-10}$  Einsteins s<sup>-1</sup>) and a water filter.

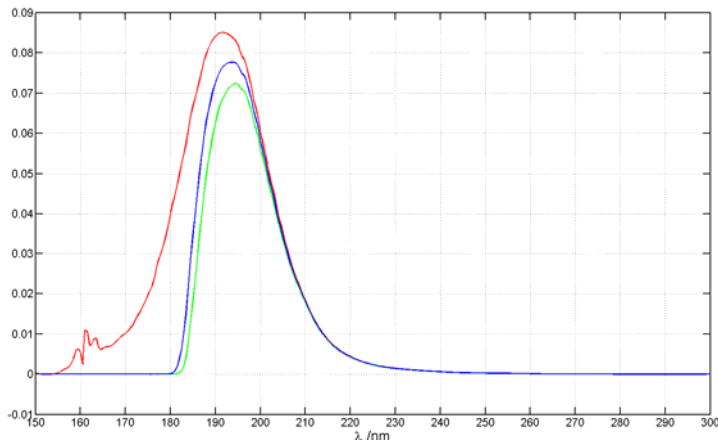

**Fig S1.** Calculated emission spectrum of the D<sub>2</sub>-lamp. Red line: 193-nm bandpass filter; blue line: 193-nm bandpass filter + 0.5-cm-water filter; green light: 193-nm bandpass filter + 1-cm-water filter.

- b) **254-nm irradiation** provided by a Xe-lamp with a krypton fluoride (KrF) excimer mirror coupled with two 1-cm-water filters and a 254-nm interference filter.

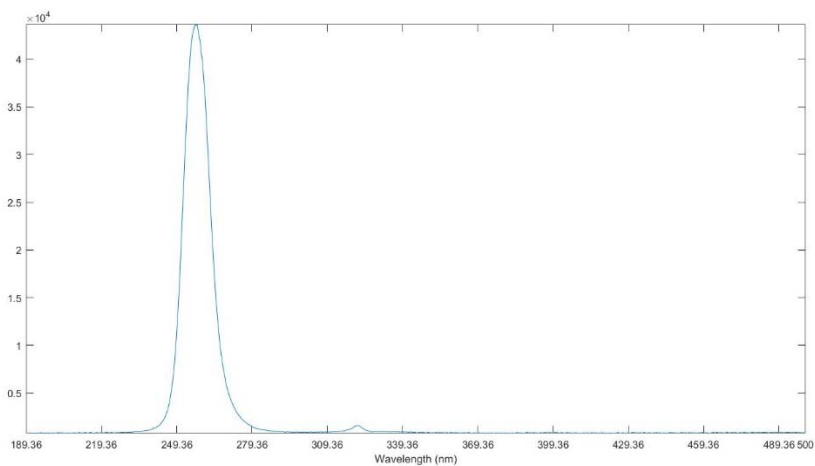

**Fig S2.** Emission spectrum of the Xe-lamp set-up (maximum band at 254 nm).

## 2. Monitoring over time the formation of photoproducts under 193-nm irradiation.

A PMMA/TPS film was irradiated at 193 nm and UV-Vis spectra were recorded every 15 minutes the first 8 hours then 12 and 24 hours.

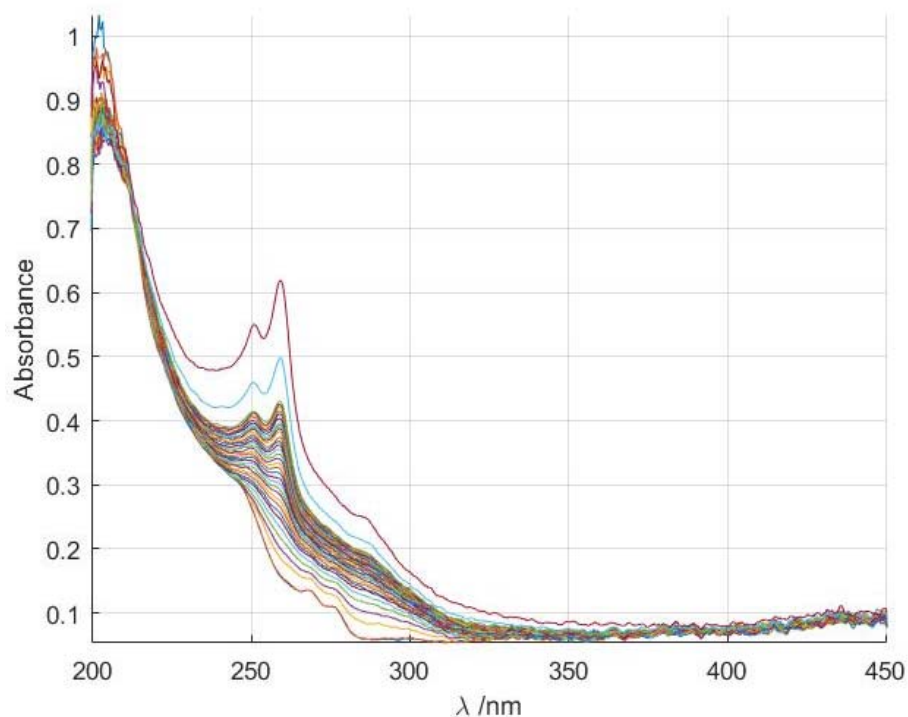

**Fig S3.** UV-Vis spectra of the photoproducts obtained over time at 193-nm irradiation.

## 3. 193-nm irradiation of TPS films with different polymer matrixes.

- a) Poly(ethyleneglycol) methyl ether ( $M_w = 2,000$ ) film (10% w/v PGME, 1% w/v TPS).

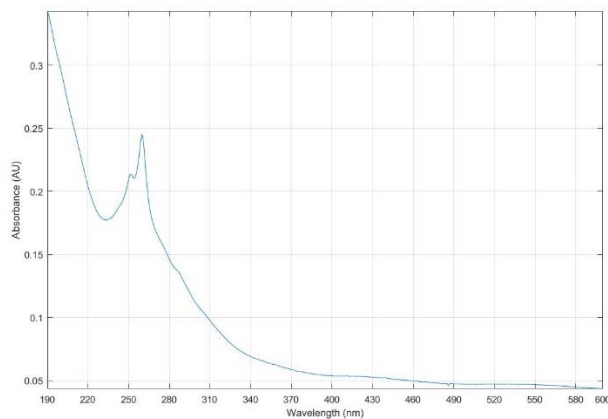

**Figure S4.** UV-Vis spectrum after 3 days of 193-nm irradiation of a PGME/TPS film.

b) Poly(tBMA-co-HEMA-co-GBLMA).

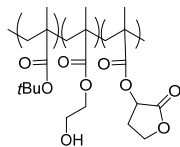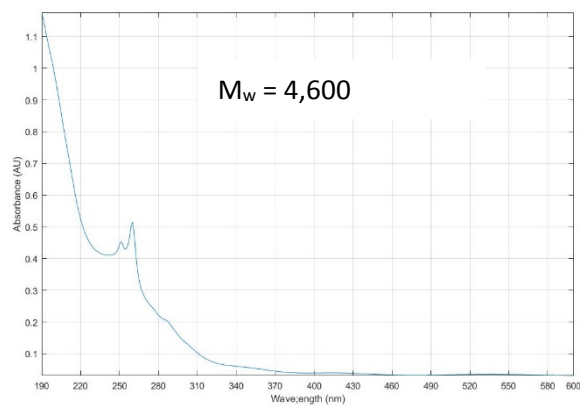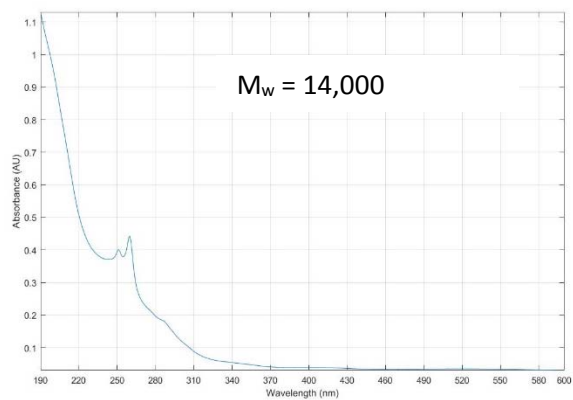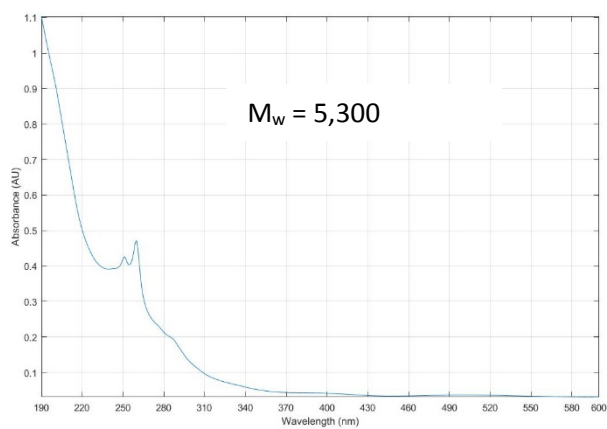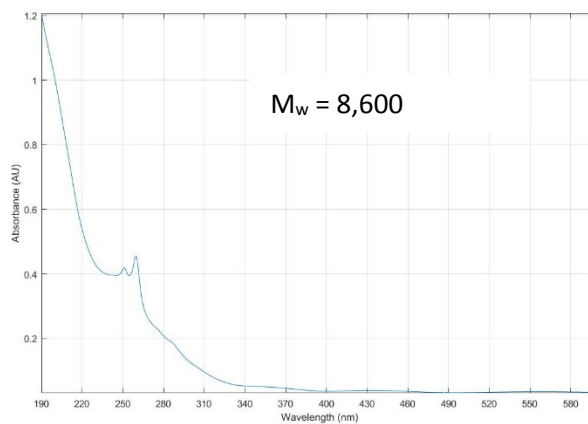

**Figure S5.** UV-Vis spectra of poly(tBMA-co-HEMA-co-GBLMA)/TPS films after 3 days of 193-nm irradiation.

#### **4. Monitoring over time the formation of photoproducts at 254-nm irradiation.**

A PMMA/TPS film was irradiated at 254 nm and UV-Vis spectra were recorded every hour during 20h.

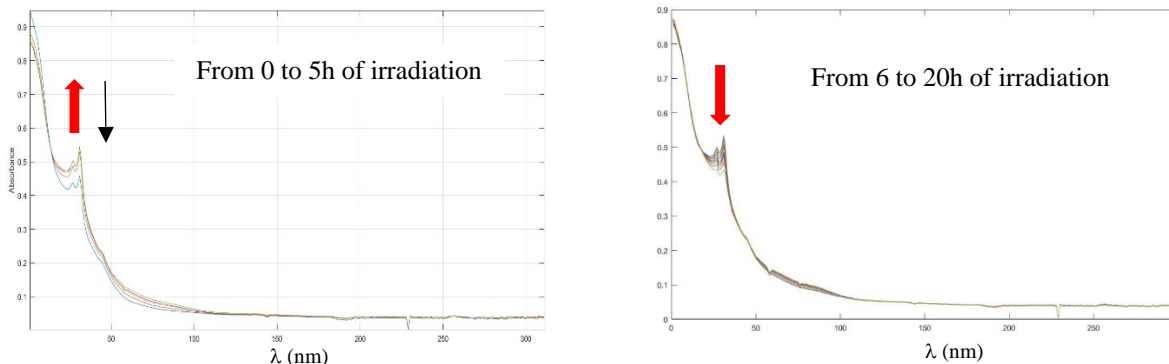

**Figure S6.** UV-Vis spectra of the photoproducts obtained over time at 254-nm irradiation.

#### **5. DOSY-NMR experiment.**

After irradiation of a 10% PMMA/ 1% TPS wafer at an exposure of 50 mJ/cm<sup>2</sup> (information on the preparation of the wafer: Coating solvent = PGMEA, Si substrate, HMDS primed and baked at 120 °C for 30 s., No BARC used, Formulation coated at 1500 rpm; soft-baked at 95 °C for 60 s., Film thickness determination ~ 3200 Å, Center dose ladder: 0, 10, 20, 30, 40 and 50 mJ/cm<sup>2</sup>, ASM-L/1100; Dipole 35y), the film was wiped off with acetone. After evaporation of the solution under vacuum, the solid was dissolved in DMSO-d<sub>6</sub> and a DOSY-NMR experiment was performed. The DOSY-NMR experiment performed was a DgcsteSL (DOSY gradient compensated stimulated echo Spin Lock) with a diffusion delay of 50 ms, a difference in gradient pulse of 5 ms and an array of 15 gradient values.

(a)

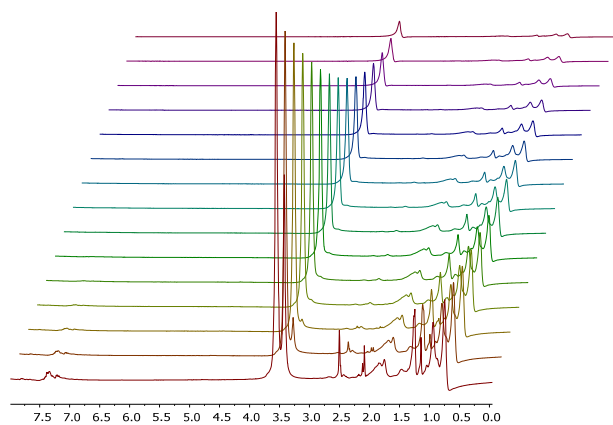

(b)

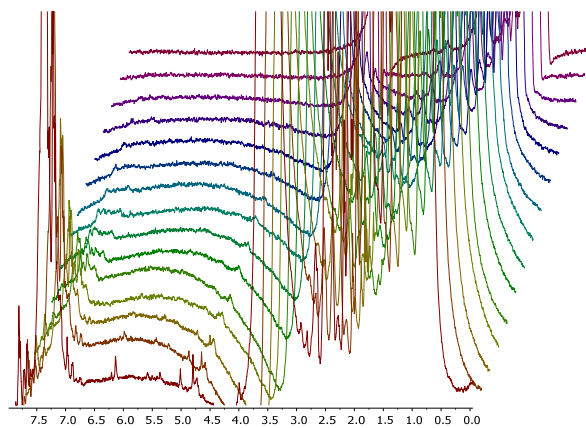

(c)

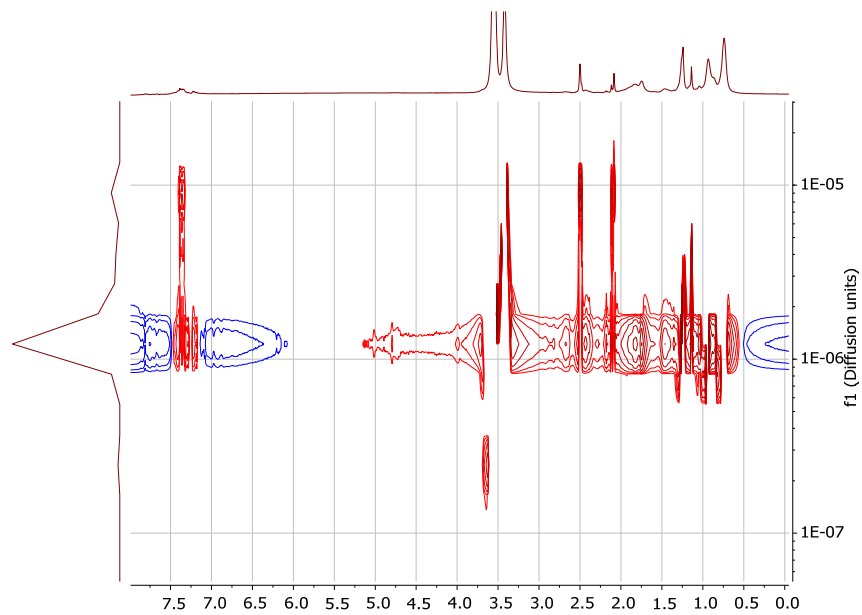

**Figure S7.** DOSY-NMR spectrum of an irradiated film a) DOSY-NMR spectrum, b) zoomed-in spectrum, and c) 2D-DOSY view.

**6. Photoproducts of TPS in solution (cuvette set-up).**

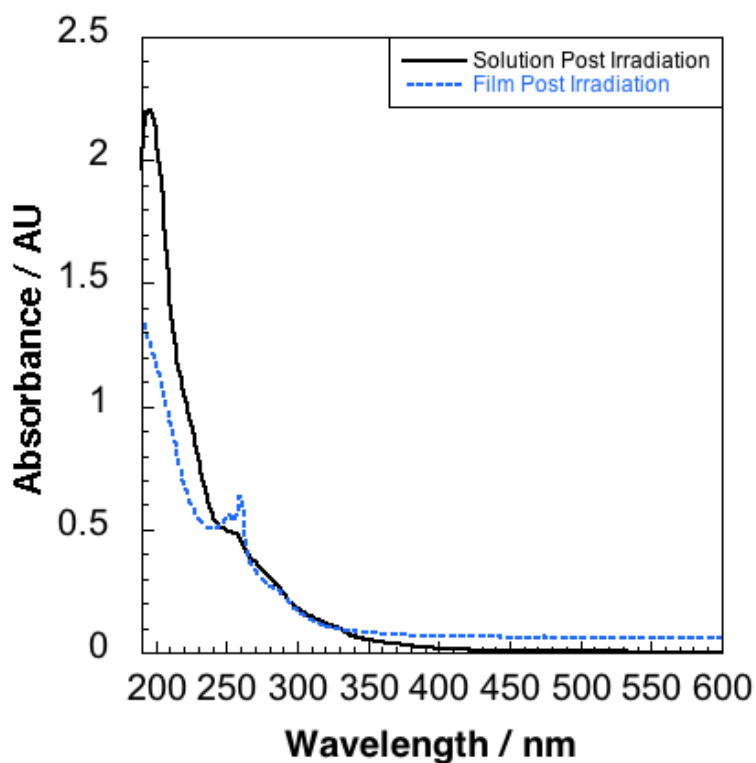

**Figure S8.** UV-Vis spectra of PMMA-TPS in acetonitrile and in film after irradiation.

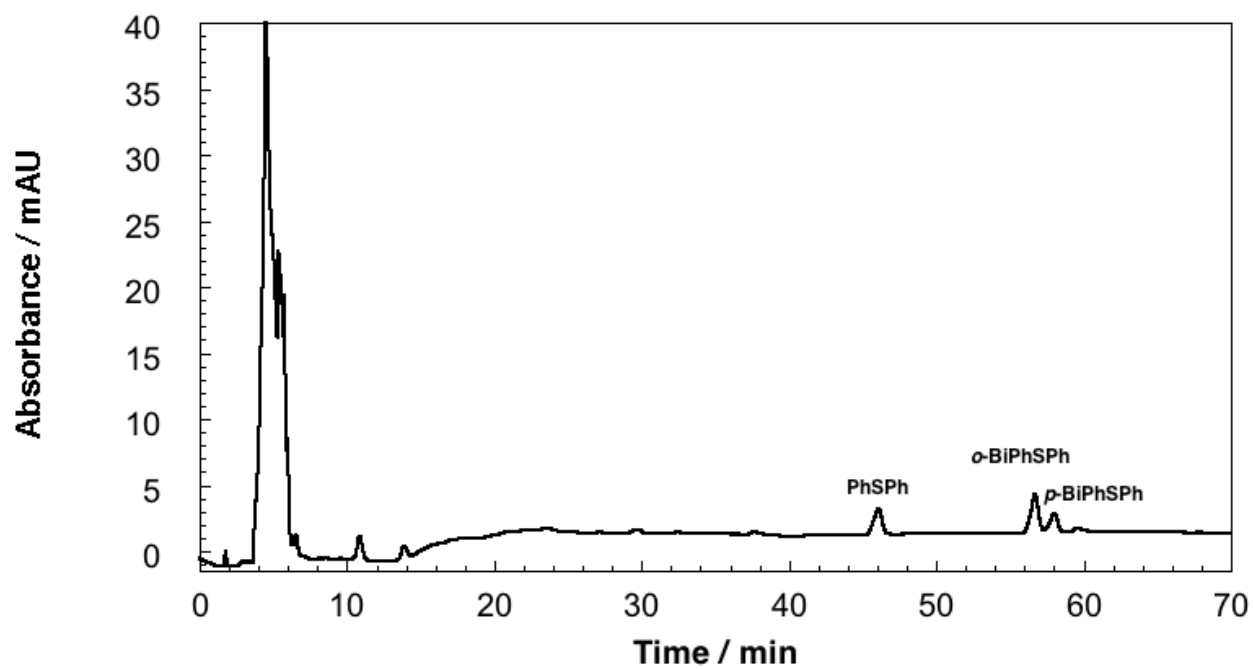

**Figure S9.** HPLC chromatogram of a PMMA-TPS solution after 3 d at 193 nm.

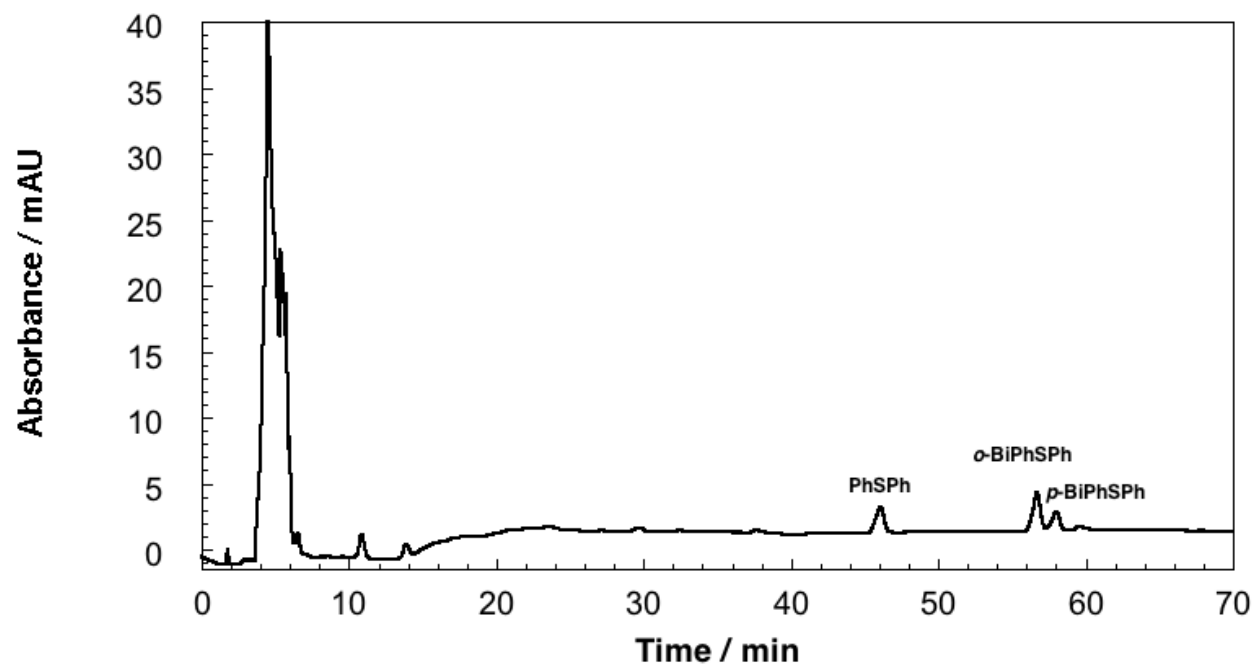

**Figure S10.** HPLC chromatogram of a PMMA-TPS solution (cuvette set-up) after 3 h at 254 nm.

| h $\nu$<br>(nm) | TPS conv.<br>(%) | acetanilie | PhSPh | 2-<br>BiPhSPh | 4-<br>BiPhSPh | Products<br>recovered (%) |
|-----------------|------------------|------------|-------|---------------|---------------|---------------------------|
| 193             | 6.7              | 1.4        | 1.6   | 2.0           | 1.0           | 99.3                      |
| 254             | 25.2             | 3.9        | 4.5   | 5.0           | 1.8           | 86.1                      |

**Table S1.** Photoproduct distribution (%) after 3 days of irradiation at 193 nm or 3 hours at 254 nm.



### 7. Photoproducts of TPS in wafers (lithography set-up).

UV-vis spectra obtained at a retention time of 15.1 minutes, corresponding to the elution of 2-BiPhSPH.

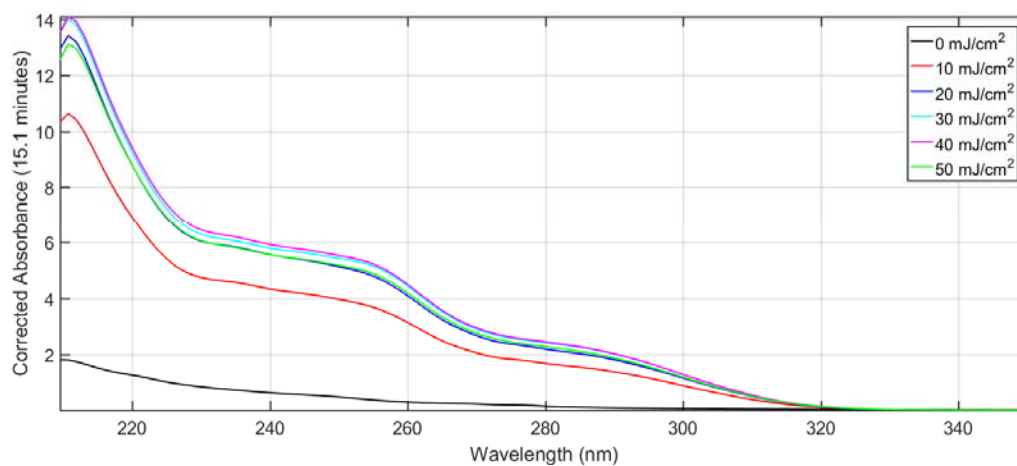

**Figure S11.** UV-vis spectra taken at 15.1 minutes retention time from GPC trace, corresponding to 2-BiPhSPH fraction.

### 8. Cross-experiment by irradiation of a 10 % w/v PMMA/ 0.5% w/v TPS/ 0.5% w/v tBu-TPS film.

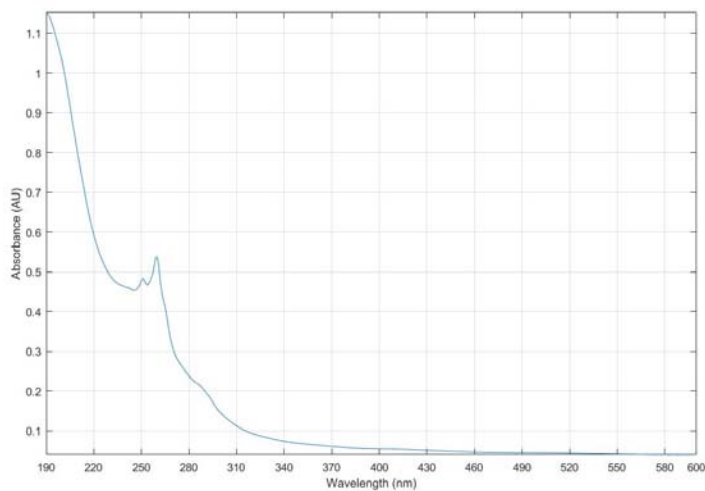

**Figure S12.** UV-Vis spectrum of PMMA/TPS/tBuTPS films after 3 days of 193-nm irradiation.

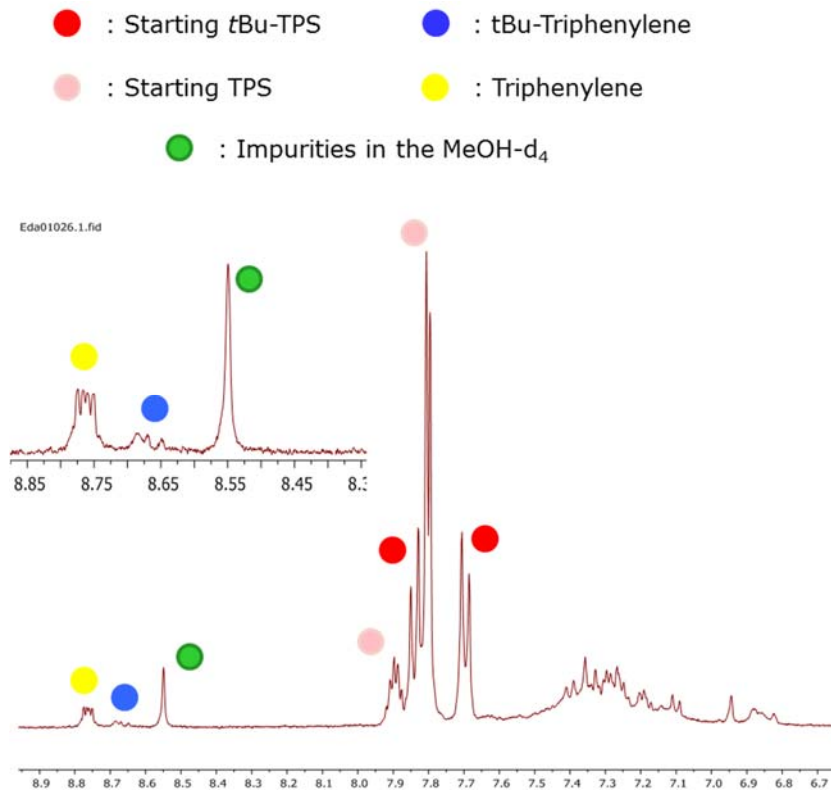

**Figure S13.** Selected range of the <sup>1</sup>H NMR spectrum after 193-nm irradiation of a 10 % w/v PMMA/ 0.5% w/v TPS/ 0.5% w/v *t*Bu-TPS film.

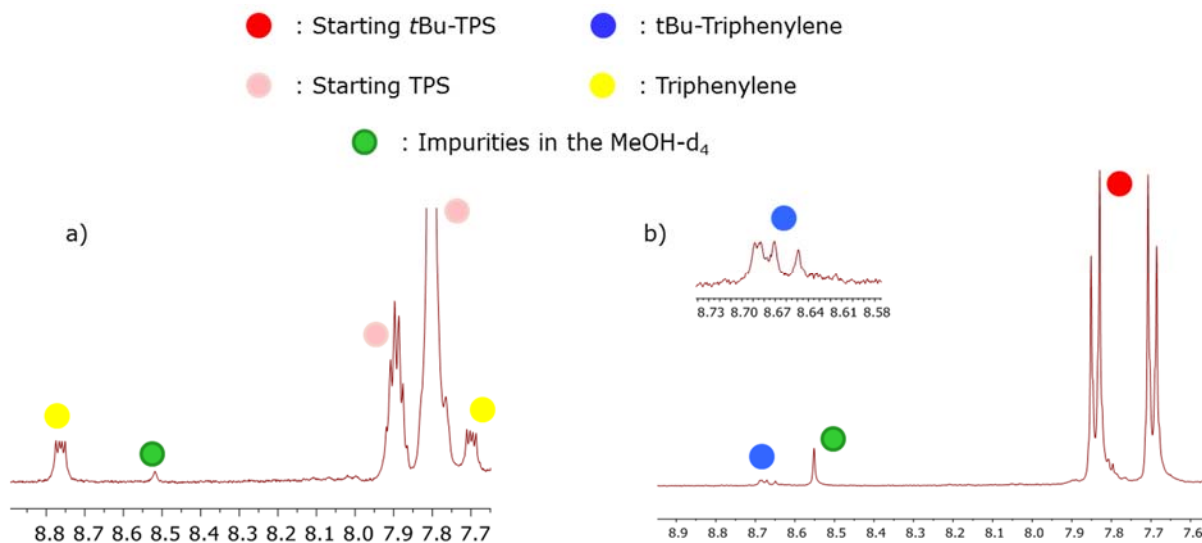

**Figure S14.** Selected range of the <sup>1</sup>H NMR spectrum after 193-nm irradiation of a) 10 % w/v PMMA/ 1% w/v TPS film, b) 10 % w/v PMMA/ 1% w/v *t*Bu-TPS film.
